# Supplementary material
Source: publisher figshare collection journal article supplement (https://frontiersin.figshare.com/ndownloader/files/28759008)
Supplement: Supplementary file [file 28759008]

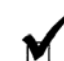

| Topic                       | Item | Checklist item description                                                                                   | Reported on Line                                                    |
|-----------------------------|------|--------------------------------------------------------------------------------------------------------------|---------------------------------------------------------------------|
| Title                       | 1    | The diagnosis or intervention of primary focus followed by the words "case report" .....                     | 1-3                                                                 |
| Key Words                   | 2    | 2 to 5 key words that identify diagnoses or interventions in this case report, including "case report" ...   | 62-63                                                               |
| Abstract<br>(no references) | 3a   | Introduction: What is unique about this case and what does it add to the scientific literature? .....        | 56-58                                                               |
|                             | 3b   | Main symptoms and/or important clinical findings .....                                                       | 45-46                                                               |
|                             | 3c   | The main diagnoses, therapeutic interventions, and outcomes .....                                            | 47-48 50-56                                                         |
|                             | 3d   | Conclusion—What is the main "take-away" lesson(s) from this case? .....                                      | 58-60                                                               |
| Introduction                | 4    | One or two paragraphs summarizing why this case is unique (may include references) .....                     | 68-71                                                               |
| Patient Information         | 5a   | De-identified patient specific information. ....                                                             | 74                                                                  |
|                             | 5b   | Primary concerns and symptoms of the patient. ....                                                           | 74-75                                                               |
|                             | 5c   | Medical, family, and psycho-social history including relevant genetic information .....                      | 78-79, 95-118                                                       |
|                             | 5d   | Relevant past interventions with outcomes .....                                                              | 81-82, 90-93                                                        |
| Clinical Findings           | 6    | Describe significant physical examination (PE) and important clinical findings. ....                         | 77-78, 83-85                                                        |
| Timeline                    | 7    | Historical and current information from this episode of care organized as a timeline .....                   | Figure 2                                                            |
| Diagnostic<br>Assessment    | 8a   | Diagnostic testing (such as PE, laboratory testing, imaging, surveys). ....                                  | 77-78, 79-81, 85-89                                                 |
|                             | 8b   | Diagnostic challenges (such as access to testing, financial, or cultural) .....                              | NA                                                                  |
|                             | 8c   | Diagnosis (including other diagnoses considered) .....                                                       | 79-81, 85-87                                                        |
|                             | 8d   | Prognosis (such as staging in oncology) where applicable .....                                               | 79-81, 85-87                                                        |
| Therapeutic<br>Intervention | 9a   | Types of therapeutic intervention (such as pharmacologic, surgical, preventive, self-care) .....             | 81-82, 90-91                                                        |
|                             | 9b   | Administration of therapeutic intervention (such as dosage, strength, duration) .....                        | NA                                                                  |
|                             | 9c   | Changes in therapeutic intervention (with rationale) .....                                                   | 81-82, 90-91                                                        |
| Follow-up and<br>Outcomes   | 10a  | Clinician and patient-assessed outcomes (if available) .....                                                 | 91-93                                                               |
|                             | 10b  | Important follow-up diagnostic and other test results .....                                                  | 91-93                                                               |
|                             | 10c  | Intervention adherence and tolerability (How was this assessed?) .....                                       | NA                                                                  |
|                             | 10d  | Adverse and unanticipated events .....                                                                       | NA                                                                  |
| Discussion                  | 11a  | A scientific discussion of the strengths AND limitations associated with this case report .....              | 198-200, 202-204                                                    |
|                             | 11b  | Discussion of the relevant medical literature <b>with references</b> . ....                                  | 121-197                                                             |
|                             | 11c  | The scientific rationale for any conclusions (including assessment of possible causes) .....                 | 142-143, 144-149                                                    |
|                             | 11d  | The primary "take-away" lessons of this case report (without references) in a one paragraph conclusion ..... | 200-202                                                             |
| Patient Perspective         | 12   | The patient should share their perspective in one to two paragraphs on the treatment(s) they received .....  | NA                                                                  |
| Informed Consent            | 13   | Did the patient give informed consent? Please provide if requested .....                                     | Yes <input checked="" type="checkbox"/> No <input type="checkbox"/> |
